CORRECTION

# Correction: pFAK-Y397 overexpression as both a prognostic and a predictive biomarker for patients with metastatic osteosarcoma

The *PLOS ONE* Staff

There is an error in [Table 2](#). Two cells in the row corresponding to patients under 18 years of age at diagnosis were incorrectly shifted to the left. The value “6” should appear in the “*n*” column and “16 (3.1–28.4)” should be listed in the “Mean months (95% CI)” column. The publisher apologizes for this error. Please see the corrected [Table 2](#) here.

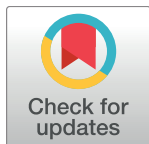

## OPEN ACCESS

**Citation:** The *PLOS ONE* Staff (2017) Correction: pFAK-Y397 overexpression as both a prognostic and a predictive biomarker for patients with metastatic osteosarcoma. *PLoS ONE* 12(11): e0188991. <https://doi.org/10.1371/journal.pone.0188991>

**Published:** November 29, 2017

**Copyright:** © 2017 The PLOS ONE Staff. This is an open access article distributed under the terms of the [Creative Commons Attribution License](#), which permits unrestricted use, distribution, and reproduction in any medium, provided the original author and source are credited.

**Table 2. Kaplan-Meier survival analyses for overall survival of all patients with osteosarcoma and for overall survival and post metastases overall survival of patients with osteosarcoma presented with metastases at diagnosis or developed metastases during treatment/follow-up.**

| Characteristics                                    | All patients with osteosarcoma<br>(n = 53) |                         |                      | Patients with metastatic osteosarcoma (n = 33) |                         |                      |      |                         |                      |
|----------------------------------------------------|--------------------------------------------|-------------------------|----------------------|------------------------------------------------|-------------------------|----------------------|------|-------------------------|----------------------|
|                                                    | OS                                         |                         |                      | OS                                             |                         |                      | PMOS |                         |                      |
|                                                    | n                                          | Mean months<br>(95% CI) | P value <sup>d</sup> | n                                              | Mean months<br>(95% CI) | P value <sup>d</sup> | n    | Mean months<br>(95% CI) | P value <sup>d</sup> |
| Age at diagnosis <sup>a</sup>                      |                                            |                         |                      |                                                |                         |                      |      |                         |                      |
| ≤ 18 yrs                                           | 42                                         | 56 (40.9–70.9)          | 0.013*               | 27                                             | 34 (23.9–43.3)          | 0.062                | 27   | 24 (15.8–32.4)          | 0.011*               |
| > 18 yrs                                           | 11                                         | 19 (8.4–28.9)           |                      | 6                                              | 16 (3.1–28.4)           |                      | 6    | 9 (3.3–15.2)            |                      |
| Gender                                             |                                            |                         |                      |                                                |                         |                      |      |                         |                      |
| Male                                               | 36                                         | 51 (34.7–66.8)          | 0.780                | 27                                             | 32 (21.6–42.0)          | 0.485                | 27   | 23 (14.0–31.4)          | 0.389                |
| Female                                             | 17                                         | 45 (24.2–66.2)          |                      | 6                                              | 24 (16.1–31.8)          |                      | 6    | 16 (8.9–23.5)           |                      |
| Site of tumor                                      |                                            |                         |                      |                                                |                         |                      |      |                         |                      |
| Femur                                              | 31                                         | 58 (39.2–77.2)          | 0.326                | 16                                             | 32 (20.5–43.7)          | 0.661                | 16   | 26 (14.7–37.6)          | 0.208                |
| Tibia or fibula or others                          | 22                                         | 40 (24.2–55.0)          |                      | 17                                             | 28 (16.5–39.6)          |                      | 17   | 16 (9.0–23.6)           |                      |
| Histologic subtype                                 |                                            |                         |                      |                                                |                         |                      |      |                         |                      |
| Non osteoblastic                                   | 25                                         | 62 (41.1–81.9)          | 0.102                | 16                                             | 36 (24.0–47.9)          | 0.140                | 16   | 22 (15.3–28.7)          | 0.451                |
| Osteoblastic                                       | 28                                         | 37 (22.6–51.7)          |                      | 17                                             | 24 (13.8–33.4)          |                      | 17   | 19 (8.9–29.0)           |                      |
| Primary tumor volume <sup>b</sup>                  |                                            |                         |                      |                                                |                         |                      |      |                         |                      |
| < 500 mL                                           | 26                                         | 69 (49.2–89.3)          | 0.002*               | 12                                             | 43 (26.4–59.6)          | 0.074                | 12   | 28 (12.6–43.8)          | 0.374                |
| ≥ 500 mL                                           | 19                                         | 24 (15.2–33.0)          |                      | 14                                             | 24 (14.4–32.6)          |                      | 14   | 20 (11.9–27.1)          |                      |
| Presence of metastasis at diagnosis                |                                            |                         |                      |                                                |                         |                      |      |                         |                      |
| No                                                 | 34                                         | 65 (47.1–82.8)          | 0.0003*              | 14                                             | 41 (28.5–52.8)          | 0.037*               | 14   | 18 (12.3–24.4)          | 0.882                |
| Yes                                                | 19                                         | 22 (12.5–30.7)          |                      | 19                                             | 22 (12.5–30.7)          |                      | 19   | 21 (12.1–30.4)          |                      |
| Time to metastases                                 |                                            |                         |                      |                                                |                         |                      |      |                         |                      |
| > 12 months                                        |                                            |                         |                      | 8                                              | 53 (37.1–69.4)          | 0.028*               | 8    | 21 (11.9–29.4)          | 0.688                |
| ≤ 12 months                                        |                                            |                         |                      | 6                                              | 25 (16.6–33.1)          |                      | 6    | 16 (7.1–25.0)           |                      |
| At diagnosis                                       |                                            |                         |                      | 19                                             | 22 (12.5–30.7)          |                      | 19   | 21 (12.1–30.4)          |                      |
| Site of metastases                                 |                                            |                         |                      |                                                |                         |                      |      |                         |                      |
| Lung only                                          |                                            |                         |                      | 25                                             | 34 (24.0–44.7)          | 0.050                | 25   | 25 (15.6–33.6)          | 0.019*               |
| Bone or multiple organs                            |                                            |                         |                      | 8                                              | 18 (8.5–26.5)           |                      | 8    | 12 (6.7–16.4)           |                      |
| Histologic response <sup>c</sup>                   |                                            |                         |                      |                                                |                         |                      |      |                         |                      |
| Good                                               | 13                                         | 87 (59.2–114.7)         | 0.024*               | 5                                              | 37 (17.0–57.5)          | 0.379                | 5    | 25 (7.5–42.3)           | 0.419                |
| Poor                                               | 22                                         | 41 (27.4–53.8)          |                      | 16                                             | 29 (19.6–38.8)          |                      | 16   | 20 (14.1–25.2)          |                      |
| Chemotherapy                                       |                                            |                         |                      |                                                |                         |                      |      |                         |                      |
| Both neoadjuvant & adjuvant                        | 34                                         | 65 (48.0–81.8)          | 0.00003*             | 21                                             | 34 (25.0–43.8)          | 0.133                | 21   | 23 (16.6–29.0)          | 0.183                |
| Either neoadjuvant or adjuvant, or no chemotherapy | 19                                         | 20 (9.4–30.0)           |                      | 12                                             | 22 (8.3–35.1)           |                      | 12   | 17 (3.8–29.9)           |                      |
| Total FAK expression                               |                                            |                         |                      |                                                |                         |                      |      |                         |                      |
| Non-over                                           | 5                                          | 66 (21.1–109.9)         | 0.449                | 2                                              | 29 (17.5–40.9)          | 0.958                | 2    | 21 (15.2–26.6)          | 0.962                |
| Over                                               | 48                                         | 45 (32.6–57.0)          |                      | 31                                             | 30 (21.3–39.4)          |                      | 31   | 21 (13.8–29.0)          |                      |
| pFAK-Y397 expression                               |                                            |                         |                      |                                                |                         |                      |      |                         |                      |
| Non-over                                           | 20                                         | 60 (37.5–82.5)          | 0.258                | 12                                             | 41 (23.2–58.1)          | 0.044*               | 12   | 32 (14.9–48.6)          | 0.029*               |
| Over                                               | 33                                         | 40 (26.2–54.6)          |                      | 21                                             | 24 (16.4–32.1)          |                      | 21   | 15 (11.5–19.4)          |                      |
| Total FAK/pFAK-Y397 co-expression                  |                                            |                         |                      |                                                |                         |                      |      |                         |                      |
| Non-over/non-over                                  | 5                                          | 66 (21.1–109.9)         | 0.502                | 2                                              | 29 (17.5–40.9)          | 0.098                | 2    | 21 (15.2–26.6)          | 0.071                |
| Over/non-over                                      | 15                                         | 49 (29.0–68.3)          |                      | 10                                             | 43 (22.3–63.6)          |                      | 10   | 34 (14.0–53.8)          |                      |

(Continued)

Table 2. (Continued)

| Characteristics | All patients with osteosarcoma (n = 53) |                      |                      | Patients with metastatic osteosarcoma (n = 33) |                      |                      |      |                      |                      |
|-----------------|-----------------------------------------|----------------------|----------------------|------------------------------------------------|----------------------|----------------------|------|----------------------|----------------------|
|                 | OS                                      |                      |                      | OS                                             |                      |                      | PMOS |                      |                      |
|                 | n                                       | Mean months (95% CI) | P value <sup>d</sup> | n                                              | Mean months (95% CI) | P value <sup>d</sup> | n    | Mean months (95% CI) | P value <sup>d</sup> |
| Over/over       | 33                                      | 40 (26.2–54.6)       |                      | 21                                             | 24 (16.4–32.1)       |                      | 21   | 15 (11.5–19.4)       |                      |

CI, confidence interval; OS, overall survival; PMOS, post metastases overall survival.

<sup>a</sup> Mean value of age at diagnosis: patients with metastatic osteosarcoma,  $\leq 21$  yrs vs  $> 21$  yrs.

<sup>b</sup> All patients with osteosarcoma, evaluated only in 45 patients (8 patients, no preoperative MRI); patients with metastatic osteosarcoma, evaluated only in 26 patients (7 patients, no preoperative MRI).

<sup>c</sup> All patients with osteosarcoma, evaluated only in 35 patients who received neoadjuvant chemotherapy (5 patients, no neoadjuvant chemotherapy; 5 patients, no chemotherapy; 8 patients, no data); patients with metastases, evaluated only in 21 patients who received neoadjuvant chemotherapy (5 patients, no neoadjuvant chemotherapy; 5 patients, no chemotherapy; 2 patients, no data).

<sup>d</sup> Log rank (Mantel-Cox) test.

\* Statistically significant.

<https://doi.org/10.1371/journal.pone.0188991.t001>

## Reference

1. Thanappaprasr K, Narthananarung A, Thanappaprasr D, Jinawath A (2017) pFAK-Y397 overexpression as both a prognostic and a predictive biomarker for patients with metastatic osteosarcoma. PLoS ONE 12(8): e0182989. <https://doi.org/10.1371/journal.pone.0182989> PMID: 28846700
